# Supplementary material for: Novel evidence that pituitary gonadotropins directly stimulate human leukemic cells-studies of myeloid cell lines and primary patient AML and CML cells
Source: PubMed Central journal article supplement (PMC4823088; doi:10.18632/oncotarget.6698), 2015-12-20
Supplement: oncotarget-07-3033-s001.pdf [file oncotarget-07-3033-s001.pdf]

# Novel evidence that pituitary gonadotropins directly stimulate human leukemic cells -studies of myeloid cell lines and primary patient AML and CML cells

## Supplementary Materials

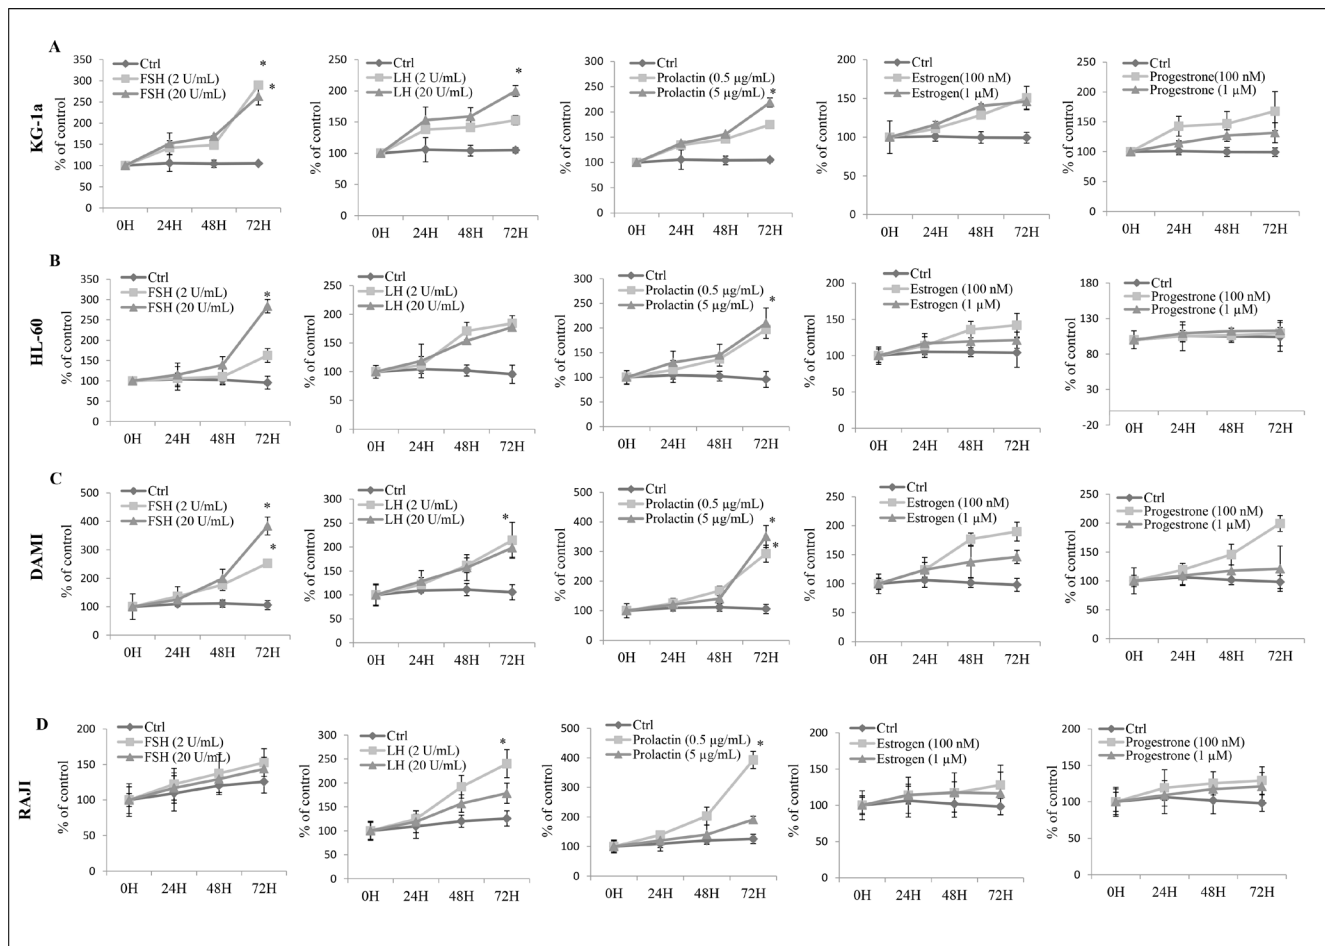

**Supplementary Figure 1: Human myeloid and lymphoid leukemia cells proliferate *in vitro* and migrate *in vivo* in response to SexHs.** (A–C) Proliferation of human myeloid (myelogenous [KG-1a, A], pro-myelocytic [HL-60, B], megakaryoblastic/cytic [DAMI, C]) leukemia cells by pituitary and gonadal SexHs in a dose-dependent manner. Panels (D) Proliferation of human B-lymphoid (lymphomas [RAJI, D], leukemia cells by pituitary and gonadal SexHs, in a dose-dependent manner. For statistical comparisons, a one-way analysis of variance and a Tukey's test for post hoc analysis was carried out, and means  $\pm$  SD are shown. Significance levels,  $*p \leq .05$  versus control.

**Supplementary Table S1: Clinical, phenotypical and molecular characteristics of AML patients**

|                                                                |                  |
|----------------------------------------------------------------|------------------|
| Number of patients                                             | 10               |
| Median (range) age (years)                                     | 57.5 (21–62)     |
| Median (range) white blood cell count (G/l)                    | 57.2 (9.9–199.5) |
| Median (range) of the blastic cells in peripheral blood        | 76 (21–97)       |
| Median (range) of the CD33 positivity within blastic cells [%] | 92 (78–98)       |
| AML according to FAB classification                            | 10               |
| AML, minimally differentiated, M0                              | 2                |
| AML without maturation, M1                                     | 2                |
| AML with maturation, M2                                        | 3                |
| Acute myelomonocytic leukemia (AMMoL), M4                      | 3                |
| Karyotype                                                      | 46XX/46XY        |
| <i>FLT3-ITD/NPM1<sub>mut</sub>/CEBPA<sub>mut</sub></i>         | 0/0/0            |

Cytogenetic and molecular analysis, including fluorescence in situ hybridization (FISH) assays (of AML1/ETO, CBF $\beta$ / MYH11, MLLT3–MLL and frequently mutated genes FLT3–ITD, NPM1, CEBPA) were performed to determine the risk group as recommended by WHO guidelines. Based on the abovementioned parameters, all included patients presented with a normal karyotype (46XX/46XY), and none of them presented with either mutated core binding factor leukemia (CEBPA<sub>mut</sub>), mutated nucleophosmin (NPM1<sub>mut</sub>), or internal tandem duplication of Fms-like tyrosine kinase 3 (FLT3–ITD). All patients were hospitalized in the Department of Hematology of the Medical University of Bialystok in year 2014 and were qualified for 7-day induction chemotherapy regimens corresponding to the standard therapy based on the Polish Adult Leukemia Group: cytarabine was delivered as a continuous IV infusion for 7 consecutive days at a dose of 200 mg/m<sup>2</sup>; anthracycline was delivered for 3 consecutive days as an IV push at a dose of 50 mg/m<sup>2</sup>; and cladribine was administered for 5 days as an IV push at a dose of 5 mg/m<sup>2</sup> (DAC schedule) [32].

Abbreviations: AML- acute myeloid leukemia, NPM1<sub>mut</sub> -mutated nucleophosmin, CEBPA<sub>mut</sub> – mutated core binding factor leukaemia , FLT3-ITD- internal tandem duplication of Fms-like tyrosine kinase 3
